# 1 Phylogenetically conservative trait 2 correlation: quantification and 3 interpretation

4  
5 Version of 2022-12-27

6  
7 Mark Westoby, School of Natural Sciences, Macquarie University, Sydney NSW 2109  
8 Australia

9  
10 Luke Yates, ARC Centre of Excellence for Plant Success in Nature and Agriculture,  
11 University of Tasmania, Sandy Bay TAS 7005 Australia

12  
13 Barbara Holland, School of Natural Sciences, University of Tasmania, Sandy Bay TAS  
14 7005 Australia

15  
16 Ben Halliwell, ARC Centre of Excellence for Plant Success in Nature and Agriculture,  
17 University of Tasmania, Sandy Bay TAS 7005 Australia

18  
19 Corresponding author [mark.westoby@mq.edu.au](mailto:mark.westoby@mq.edu.au)

20  
21 Main text 4439 words, plus 1 Table, 4 Boxes, 2 Figures

22 Supplementary 1: Simulations

23 Supplementary 2: Mathematical aspects of phylogenetic mixed models

24 Supplementary 3: R code for the simulations reported in Figs 1 and 2

25  
26 Short title: conservative trait correlation

27  
28 Keywords: phylogenetic correction, trait correlation, evolutionary divergence, phylogenetic  
29 niche conservatism, independence, partial correlation

30  
31 Data statement: R code used for simulations is at Supplementary 3.

32

33 Author contributions: The manuscript developed from discussions between Westoby and  
34 Halliwell. Westoby drafted successive versions, Halliwell, Yates and Holland contributed  
35 expertise in multivariate phylogenetic mixed models, all authors critiqued drafts.

## 36 Abstract

- 37 1. Correlation across species between two quantitative traits, or between a trait and a habitat  
38 property, can suggest that a trait value is effective in sustaining populations in some  
39 contexts but not others. It is widely held that such correlations should be controlled for  
40 phylogeny, via phylogenetically independent contrasts PICs or phylogenetic generalised  
41 least squares PGLS.
- 42 2. Two weaknesses of this idea are discussed. First, the phylogenetically conservative share  
43 of the correlation ought not to be excluded from consideration as potentially ecologically  
44 functional. Second, PGLS does not yield a complete or accurate breakdown of A-B  
45 covariation, because it corresponds to a generating model where B predicts variation in A  
46 but not the reverse.
- 47 3. Multi-response mixed models using phylogenetic covariance matrices can quantify  
48 conservative trait correlation CTC, a share of covariation between traits A and B that is  
49 phylogenetically conservative. Because the evidence is from correlative data, it is not  
50 possible to split CTC into causation by phylogenetic history versus causation by  
51 continuing reciprocal selection between A and B. Moreover, it is quite likely biologically  
52 that the two influences have acted in concert, through phylogenetic niche conservatism.
- 53 4. Synthesis: The CTC concept treats phylogenetic conservatism as a conjoint interpretation  
54 alongside ongoing influence of other traits. CTC can be quantified via multi-response  
55 phylogenetic mixed models.

56

## 57 Introduction

58 Ecological research often takes an interest in correlations across species between two traits,  
59 or between a trait and a property of the species habitat. For example, seed size is correlated  
60 (fairly loosely,  $r^2 = 0.29$ ) with the size reached by species as adults (Falster, Moles, and  
61 Westoby 2008). One motivation for investigating how closely traits are correlated is simply  
62 to understand variation across the world's species, and to quantify how traits might be  
63 clustered together into spectra of variation. For example, a unified size spectrum has been  
64 suggested (e.g. Díaz et al. 2016) that embraces both seed size and adult size. Another  
65 motivation is that an observed correlation might be consistent with some proposed  
66 mechanism connecting the two traits, or alternatively a lack of correlation might argue  
67 against a mechanism. For example, it can be suggested that taller species typically suffer  
68 more competitive mortality between seedling and reproductive stages, and this puts a stronger  
69 selective premium on large seed size (Falster, Moles, and Westoby 2008).

70

71 A present-day correlation between seed size and potential plant size across species can be  
72 interpreted as caused by trajectories of change through past evolution. Equally, the past  
73 trajectories can be interpreted as movement toward evolutionary attractors, produced by an  
74 ecological mechanism that exerts continuing selective pressure in the present day. Either of  
75 those versions of causation are consistent with observed correlations between traits, or  
76 between a trait and habitat.

77

78 It is important to be clear that correlations across species come from observational or survey  
79 evidence. They can offer support for some proposed mechanism or argue against it, but they  
80 can not significance-test them in the same sense as manipulative experimental treatments can.  
81 In manipulative experiments, the treatment is cause and the outcome is effect, and other  
82 factors are controlled or randomized so that each replicate yields an independent item of  
83 evidence for the link between cause and effect. Because the items of evidence are  
84 independent, a P-value for the ensemble of events can be calculated with confidence.  
85 Whereas in survey evidence, some unmeasured or uncontrolled variable might be creating a  
86 correlation between the two focal traits, or counteracting it.

87

88 Where investigators have thought about third and fourth variables as possible influences, and  
89 have been able to obtain measurements for them, a more limited sort of independence can be  
90 obtained by controlling or partialling for these third or fourth variables, or equivalently by

91 applying multiple regression. Residuals are obtained for the focal variables after regression  
92 on the covariates, and correlations between the residuals are then inspected. But this is still a  
93 very different sort of independence compared to the evidence that emerges from a  
94 manipulative experiment. If an A-B correlation disappears after partialling for C, it still  
95 remains a possibility that C was a secondary correlate and the true mechanism runs between  
96 A and B. Plus there remain variables D, E, F and so forth that might have been the true cause  
97 but were not measured or not even thought of.

98

99 Structured causal modeling SCM (Pearl 2009) or graphical causal modeling (Cronin and  
100 Schoolmaster Jr. 2018) is a framework that purports to determine cause-and-effect  
101 relationships from observational data (Arif and MacNeil 2022). However, the conditions for  
102 identifying causation unambiguously are stringent. The causal maps are required to be  
103 directed acyclic graphs (DAGs), with no recursion to variables earlier in the causal chain. It  
104 must be possible to list all competing causal hypotheses in order to compare them, and each  
105 must correspond to a different chain of causation between variables. In our opinion (contra  
106 Cronin and Schoolmaster Jr. 2018), these conditions are not ever met by the situations of  
107 interest here, coordination across species among traits and habitat and their relationship to  
108 phylogeny. Coordination between traits happens because the current value of each trait  
109 influences natural selection on the other (recursion). Traits also influence the habitats where  
110 the clade is successful, and habitat in turn exerts natural selection on the traits (again  
111 recursion). A map leading from clade membership to trait values always has alternative  
112 causal interpretations: (1) that traits are intrinsically slow to change so that clade signal  
113 remains, and (2) niche conservatism, that there is continuing ecological selection from other  
114 traits in combination with habitat.

115

116 It is widely held that correcting or controlling or accounting for phylogeny (methodology  
117 summarized in Box 1) should be mandatory when ecologists consider present-day  
118 functionality of traits in combination with each other or with different environments (e.g.  
119 Losos 2011; Garamszegi 2014; Swenson 2020; Revell and Harmon 2022). Reviewers and  
120 editors of ecology journals commonly require authors to control for phylogeny. Despite this  
121 strong majority view insisting on the practice during review, experts have raised substantial  
122 questions about what is achieved by controlling for phylogeny (Box 2).

123

124 Correcting an A-B relationship for phylogeny uses the same logic as partialling it for a  
125 continuous variable C. The commonest justification why phylogenetic correction should be  
126 mandatory is to say that related species are not independent (Felsenstein 1985, and very often  
127 repeated up to the present day, e.g. Symonds and Blomberg 2014). An A-B relationship  
128 controlled for phylogeny is often interpreted as a corrected or improved version of the simple  
129 cross-species relationship. This interpretation is not correct. Rather, phylogenetically  
130 controlled relationships measure different properties of the data, compared to relationships  
131 across present-day species. They address a different question (see section below “What does  
132 phylogenetic generalised least squares quantify?”).

133

134 A statistical method corresponds to a generating model. Its equations, variables and  
135 probability distributions express models for causation or for prediction. Only if the generating  
136 model is well aligned with a biological hypothesis will a clear answer be delivered. The  
137 statistical models fitted, the causal or predictive maps hypothesized, and the biological  
138 questions of interest are all aspects of the same issue.

139

140 The PGLS and PIC methods mainly used for controlling for phylogeny correspond to  
141 particular generating models. Our main aim here is to show that these generating models do  
142 not necessarily correspond to questions that ecologists want to ask. Further, the fact that they  
143 are couched in terms of least squares regression of A against B does not adequately represent  
144 a generating process whereby A and B reciprocally influence each other. Another aim here is  
145 to put forward multi-response or multivariate phylogenetic mixed models (MR-PMM). These  
146 treat A and B as joint responses and partition the different correlations in a way that does not  
147 treat phylogeny and present-day function as alternative interpretations. MR-PMM are not  
148 new (Lynch 1991; Housworth, Martins, and Lynch 2004), but have not come into common  
149 use in ecology.

150

## 151 [Quantifying conservative trait correlation via multi-trait response](#) 152 [models](#)

153 The most straightforward reason why controlling for phylogeny should not be interpreted as  
154 automatically correcting or improving an A-B relationship, is that present-day influence from  
155 B and phylogenetic conservatism overlap as explanations for variation in A. Controlling for  
156 phylogeny is advocated with a view to discarding, or partialling out, A-B covariation that is

157 phylogenetically conservative from the A-B relationship. From the perspective of  
158 understanding present-day ecological differences across species, this means that differences  
159 between major clades are downweighted as contributors. To the extent differences between  
160 major clades are important in present-day ecology, it risks throwing the baby (or large parts  
161 of it) out with the bathwater (Hansen 2014; de Bello et al. 2015).

162

163 A constructive solution to this problem of interpretation lies in multi-response phylogenetic  
164 mixed models (MR-PMM; Halliwell, Yates, and Holland 2022). These models decompose  
165 trait-level covariance and variance into phylogenetic and independent components (details in  
166 Box 3 and Table 1). A component of A-B correlation that is also phylogenetically structured  
167 can be identified and quantified. We refer to this quantity as the conservative trait correlation  
168 CTC. In these MR-PMM, as in PGLS, a matrix of covariances expected from a phylogenetic  
169 generating model appears as part of the residual structure on the right hand side. The key  
170 difference from PGLS is that traits A and B are jointly modelled as response variables on the  
171 left hand side (hence the name multi-response), and both their phylogenetic and independent  
172 correlations are parameters to be estimated. This makes it possible to decompose the A-B  
173 correlation into a component that is also phylogenetically structured (conservative trait  
174 correlation) and a component that is independent of phylogeny (Table 1). It has also the  
175 effect of treating the A-B relationship as a question of how they are coordinated rather than  
176 as a question of how B predicts A, analogous to standardized major axis (SMA) relationships  
177 rather than to ordinary least squares (OLS) regression (Warton et al. 2006). This will be  
178 appropriate for most evolutionary questions, since selective influences between traits or  
179 between a trait and a habitat property will be reciprocal.

180

181 From a statistical point of view, conservative trait correlation CTC is A-B covariation where  
182 for each trait, phylogeny and the other trait jointly are associated. It is not possible to separate  
183 them. From the point of view of interpreting biological mechanism, it is quite likely that  
184 phylogeny and each trait have acted in concert on the other trait, via phylogenetic niche  
185 conservatism (next section). MR-PMM identifies phylogenetically-conservative covariation  
186 between traits A and B (Table 1), and remains agnostic whether this covariation should be  
187 attributed to phylogenetic history or to continuing reciprocal selection between the traits, or  
188 to the synergy between those two, known as niche conservatism. This is more constructive  
189 than the PGLS partitioning, which is used with a view to separating phylogenetically-

190 conservative covariation from the estimate of the A-B relationship (see also section on  
191 PGLS).

192

### 193 Phylogenetic niche conservatism

194 Should the present-day pattern of trait-combinations across species be interpreted as caused  
195 by trajectories of change through past evolution? Or should the past trajectories be interpreted  
196 as movement toward evolutionary attractors, which continue to be attractors in the present  
197 day? A correlation between traits, or between a trait and habitat, can be interpreted in either  
198 of these ways. Traits of ecological importance are expected often to evolve in a  
199 phylogenetically conservative way. If a new ecological opportunity or niche arises, successful  
200 occupants are most likely to be drawn from clades that already possess appropriate trait-  
201 combinations. Descendants from a clade are most likely to be successful in habitats or ways  
202 of life similar to those the clade is already adapted for. Through this phylogenetic niche  
203 conservatism, large shares of present-day adaptation and phylogeny can often be bound  
204 together as a unified causal process. Differences between major clades are often important  
205 contributors to the observed variation across ecological strategies. Phylogenetic history and  
206 present-day ecological competence are complementary explanations, not mutually exclusive  
207 alternatives.

208

209 Consider the simulations described in Fig 1. In Fig 1a there is an overall correlation between  
210 traits A and B, but the correlation is generated from the difference between two major clades,  
211 and no correlation has been simulated within each clade. A similar pattern was shown in  
212 Felsenstein's (1985) Fig 7. His interpretation was that "It can immediately be seen that the  
213 apparent relationship ..... is illusory". However, Price (1997) showed that a similar pattern  
214 could in fact be produced by continuing selective forces. Fig 1b illustrates this, using a  
215 simulation driven by the same principles as Price.

216

217 In Fig 1b the broken line circumscribes an ecological attractor, a region of trait combinations  
218 in niche space that are ecologically competent. The shape of this region is of high interest for  
219 ecologists. Indeed, this is the motivation for looking at scattergrams of one trait vs another. It  
220 is supposed for both (a) and (b) of Fig 1 that orange and blue symbols represent sister clades  
221 that have diverged in trait space toward lower left and upper right. Panel (a) then assumes  
222 Brownian motion, while (b) assumes that new species can emerge only within the viable trait-



223 space and tend to be drawn from the existing clade that is nearest in trait space. In both cases  
224 each clade is phylogenetically conservative. In (a) the conservatism takes the form of  
225 sluggish Brownian motion. (If the Brownian motion is rapid, then the historical difference  
226 between the two major clades is quickly washed out.) In (b) conservatism arises from a  
227 constrained range of ecological possibilities.

228

229 The point is that the observed pattern across present-day species cannot help to decide which  
230 of these causative interpretations is more likely. Further, the process in Fig 1b is both  
231 phylogenetically conservative and also caused by ecological constraints continuing into the  
232 present day. Data analysis should not treat these as competing alternatives. Better for it to  
233 identify conservative trait correlation, the share of trait correlation that might be attributed  
234 either to phylogenetic history or to continuing functionality or to a combination of the two.

235

236 The question how much to interpret functional traits in terms of past history versus in terms  
237 of present-day competence itself has a history (brief summary in Box 4). To some extent it  
238 reflects tension between the outlooks of evolutionists and ecologists.

239

240 When ecological selection has favoured high trait A in conjunction with high trait B through  
241 the length of phylogenetic history, as well as in the present day (as in Fig 1c), then ordinary  
242 regression across species and PGLS will yield similar results (Fig 2, simulation S1), because  
243 the trait correlation pattern across phylogenetic divergences is similar to the pattern across  
244 present-day species. This is a very common case in real datasets (Ackerly 1999; Carvalho,  
245 Diniz-Filho, and Bini 2006). Nevertheless, this similarity should not be the basis for choosing  
246 OLS in preference to PGLS or vice versa. These two analyses, and also MR-PMM, are  
247 different in what features of the data they model. Analyses should be chosen to match the  
248 assumptions of the generating model and the question being addressed, even though OLS and  
249 PGLS quite often yield similar slopes.

250

## 251 [Controlling for phylogeny does not confer strong-sense independence](#)

252 The most common justification why controlling for phylogeny should be mandatory is to say  
253 that related species are not independent (Felsenstein 1985, and very often repeated up to the  
254 present day). This justification implies that independence is restored by controlling for  
255 phylogeny. But that implication is only correct in a very limited sense.



256

257 Independence is used with two meanings. The looser meaning is simply “uncorrelated”. Seed  
258 size can be said to lack independence from plant asymptotic height. Independence can be said  
259 to be restored by replacing the absolute seed size with residuals around a regression of seed  
260 size on plant height. However, this is a conditional independence, from a fitted function of  
261 plant height only, not from all possible confounding variables.

262

263 The tighter meaning of independence is about formally significance-testing a hypothesized  
264 causal mechanism. If causal events are independent, their probabilities can be multiplied to  
265 yield the probability of the ensemble of events. When phylogenetic correction is said to be  
266 obligatory because cross-species correlations lack independence, the suggestion is that after  
267 correction, independence will be ensured in this tighter sense, and a reliable significance test  
268 will ensue. But significance tests from survey or correlative data should not be interpreted as  
269 clean tests of causation anyhow. An A-B correlation may be more or less consistent with a  
270 proposed causation, but it does not provide significance-tested proof. Correcting for  
271 phylogeny using structured residuals addresses one sort of cross-correlation, but not all.

272 There may always be further variables unmeasured or not even thought of that are correlated  
273 with both A and B (Price 1997). And further, in a network of interconnected variables,  
274 correlations do not by themselves resolve the pathways along which causation runs.

275

276 Criteria need to be invoked from outside the correlative data. Some causal pathways might  
277 seem more plausible than others in light of known mechanisms, or parsimony can be invoked  
278 in choosing among statistical models, or combinations of plausibility with parsimony (Yates,  
279 Richards, and Brook 2021).

280

281 Independence in this sense of independent events showing causality can really only be  
282 assured in manipulative experiments. Treatments come before outcomes in an experiment’s  
283 timeline, so it is clear which is cause and which is effect. And factors other than treatments  
284 are randomized or physically controlled, so each replicate becomes definitively an  
285 independent instance of a treatment giving rise or failing to give rise to an outcome. In  
286 situations such as social science surveys or comparisons across present-day species, there is  
287 no way to assure independence in this rigorous sense (Hernán, Hsu, and Healy 2019).

288 Significance tests should not be taken too literally when analysing survey data, but  $r^2$  and

289 similar indices that quantify the strength of correlations are useful descriptors. Cross-species  
290 relationships are correlations not causation, and remain so after adjusting for phylogeny.

291

292 To invoke independence in the context of estimating a P-value you need to specify what  
293 process is being tested for. Then the question is whether two or more events or links between  
294 variables are independent as evidence for that process. Independence is a property of the  
295 hypothesis as well as of the data structure. To say that past divergences are independent cases  
296 for a link between traits A and B while present-day species are not, is just another way of  
297 asserting that past divergences are a legitimate causative explanation while continuing  
298 present-day selection is not (Box 4).

299

300 Arguments over the primacy of causal processes cannot be resolved from data that are cross-  
301 correlated. We should look to statistical methodologies that offer the most informative  
302 decomposition of trait variance, without preferencing one causality over another. Causality  
303 can then be interpreted in light of knowledge about physiological mechanisms, or  
304 manipulative experiments demonstrating how particular trait values confer advantage  
305 depending on other traits or on habitat.

306

### 307 [What does phylogenetic generalised least squares quantify?](#)

308 Saying that PGLS accounts for phylogeny does not tell us what it actually is. What is  
309 measured by the PGLS slope and confidence intervals, and how should it be interpreted?

310

311 For phylogenetically independent contrasts PICs and for PGLS with  $\lambda$  set at 1, the slope  
312 coefficient with associated confidence interval describes divergences in A as predicted from  
313 divergences in B, taken across the population of all past divergences inferred at all the nodes  
314 in the tree. The significance test (whether the confidence intervals on the slope span zero)  
315 assesses consistency, the question whether trait divergences were correlated across most or  
316 all of the nodes.

317

318 The interpretation of PGLS with  $\lambda$  estimated lies somewhere between the extreme cases of  $\lambda$   
319 = 0 (OLS) and  $\lambda = 1$  (original PGLS). Fitted  $\lambda$  with a value less than 1 but still not zero can be  
320 interpreted as a rescaling of branch lengths in the phylogeny (Symonds and Blomberg 2014).

321 Low lambda elongates the terminal branches, reducing the expected similarity between

322 related species. With fitted  $\lambda$  the PGLS slope likely still reflects an ensemble of slopes across  
323 all divergences, but with divergences calculated on a tree with branch lengths modified by  $\lambda$ .  
324 PGLS assumes that the true generating process is consistent with ‘B predicts A’ and that B  
325 has no phylogenetic signal. These assumptions are usually not true. Unless predictor B  
326 actually is free of phylogenetic signal, the slope is confounded with the phylogenetic  
327 component of the residual variance (Supplementary 2, see also simulations in next section).  
328 This confounding will commonly have the result that some but not all of the phylogenetic  
329 signal in the A-B relationship remains in the slope estimate. Analogous issues occur in spatial  
330 statistics where environmental predictors with spatial signal are confounded with the spatial  
331 component of the residual variance (Marques, Kneib, and Klein 2022; Warton 2022).

332  
333 The focus of PICs and PGLS on describing correlation in past divergences accords with the  
334 insistence of evolutionists that adaptation is defined as the selective circumstances when a  
335 trait or trait value first came about (Box 4). PGLS does not directly measure the relationship  
336 between traits in the present day, unless  $\lambda = 0$  when it becomes an ordinary least squares  
337 regression. It is the nature of most trees that there are many nodes near the tips and rather few  
338 deep in the tree. As a result, deep nodes have only a minor influence on the PGLS-estimated  
339 relationship between divergence in A and divergence in B. But the consequences of a single  
340 deep divergence for the pattern across present-day species can sometimes be very substantial  
341 (Fig 1). Consider for example the divergence between angiosperms and gymnosperms. As  
342 well as qualitative differences such as tracheids vs vessels for water transport, these two  
343 major clades of seed plants have widely different strategies with regard to quantitative traits  
344 such as vein density in the leaves, seed size and leaf mass per area (e.g. Ackerly and Reich  
345 1999; Brodribb et al. 2005; Díaz et al. 2016). This only counts as one divergence among  
346 many in a PGLS, but it has large consequences in terms of ecological strategies sustained in  
347 the present day.

348  
349 The relationships quantified by OLS and by PGLS are different, OLS a pattern across  
350 present-day species, PGLS a pattern across past evolutionary divergences (at least with  $\lambda =$   
351 1). Biologically, these are naturally complementary questions, but they are different, and one  
352 should not be seen as replacing the other. MR-PMM quantifies both types of relationship  
353 within a single analysis, but not in quite the same way, since it models phylogenetic signal in  
354 both traits and formulates the relationship as A-B coordination rather than as predicting A  
355 from B.

356

## 357 Simulations to illustrate how MR-PMM compares to PGLS

358 To illustrate issues around niche conservatism and the decomposition provided by MR-PMM,  
359 we simulated datasets of two traits A and B. For each simulation, A and B were given the  
360 same independent or residual covariance, but different phylogenetic covariances  
361 (Supplementary 1 for details). We simulated 400 replicate datasets by generating random  
362 pure birth trees of 200 taxa. The two traits A and B were simulated from the full cross-  
363 covariance structure of the MR-PMM, comprising phylogeny-independent covariances  
364 crossed with phylogenetic covariances, rather than generating A as a scalar multiple of B, as  
365 is assumed in PGLS (e.g. Revell 2010). This structure allows the independent and  
366 phylogenetic variance in A and B to be defined separately and explicitly.

367

368 MR-PMM successfully recovers the trait-level covariances of each generating model (Fig 2),  
369 as expected since it corresponds to the generating model. Comparing these covariance  
370 estimates with PGLS is more complicated since PGLS is a single-response model and does  
371 not report covariances directly, only the  $\beta$  slope coefficient. To facilitate comparisons, the  
372 independent and phylogenetic variances of each trait were set to one which places the slope  
373 coefficients on the same scale as the correlation coefficients (see Supplementary 1 for  
374 details). This choice of scale means that the  $\beta_{OLS}$  estimate is approximately equal to the mean  
375 of the simulation values for independent and phylogenetic correlation components,  $\beta_{\lambda=1}$  is  
376 approximately equal to independent component, and  $\beta_{\lambda=MLE}$  attains an intermediate value  
377 depending on the estimated  $\lambda$ .

378

379 These simulations illustrate the following. First, when covariances between traits are similar  
380 on the phylogenetic and independent level (Fig 2, S1), then  $\beta_{\lambda=1}$ ,  $\beta_{\lambda=MLE}$  and  $\beta_{OLS}$  are also  
381 similar. Biologically, this is a common outcome (Price 1997; Ackerly 1999; Carvalho, Diniz-  
382 Filho, and Bini 2006). Second,  $\beta_{\lambda=1}$  has the effect of disregarding covariance associated with  
383 phylogenetic history during calculation of the  $\beta$  coefficient. Our central point in this paper is  
384 that phylogenetically-associated covariance should not be automatically set aside, because  
385 niche conservatism is both phylogenetic and also represents selective attractors that continue  
386 into the present day (Figure 1). Third, in the extreme case where the correlation between a  
387 pair of traits occurs exclusively on the phylogenetic level,  $\beta_{\lambda=1}$  is likely to report no  
388 relationship (Figure 2, S4). To the extent that differences between major clades are important

389 in present-day ecology, this result represents a false negative. Fourth, optimising  $\lambda$  does not  
390 resolve this problem, rather it represents a compromise between the assumptions of PGLS  
391 and OLS. Finally, because  $\beta_{\lambda=1}$ ,  $\beta_{\lambda=MLE}$  and  $\beta_{OLS}$  are all products of single-response models,  
392 they represent single-number summaries of the different components of A-B covariance  
393 present in the data (Supplementary Information 2). This means they are poor approximations  
394 of the true generating model when phylogenetic and residual covariances differ in sign (S3)  
395 or even magnitude (S2).

396

## 397 Conclusion

398 Both evolutionary and ecological questions about traits are important, but they are not the  
399 same. For ecologists interested in the present-day relationship of traits to habitat or each  
400 other, phylogenetic correction has been justified largely from the perspective that trait  
401 correlation across species might be misleading. This formulation is missing the point from  
402 the outset. Correlative data are undoubtedly capable of being misleading, and need to be  
403 approached with that mindset. But it is wrong to think that controlling or accounting for  
404 phylogeny obviates the problem.

405

406 Phylogenetically independent contrasts PICs ask about the history of divergences at nodes.  
407 The divergences, rather than the present-day species, are the population of interest. The  
408 question whether divergences in A have been consistently associated with divergences in B is  
409 a natural one for evolutionists to ask. It is complementary to the ecological question about  
410 trait-combinations that are competent in the present day, but it is not the same question.

411

412 Phylogenetic generalized least squares PGLS is currently widely recommended and used.  
413 When used with  $\lambda = 1$ , it is mathematically equivalent to PICs. However, the actual historical  
414 divergences are not inspected or graphed as they are for PICs. The slope estimate with  $\lambda = 1$   
415 describes the power of divergence in B to predict divergence in A, across the ensemble of  
416 divergences or nodes. As was the case for PICs, this slope estimate answers an interesting  
417 question, but not the question how traits are related across present-day species.

418

419 When PGLS is used with  $\lambda$  fitted to the data,  $\lambda$  will usually lie intermediate between 0 and 1,  
420 since for most traits there is some phylogenetic signal but not perfect correlation with a  
421 phylogenetic generating model. The strength of the residual phylogenetic influence is then

422 measured via  $\lambda$ . The estimated slope is intermediate between the slope across divergences  
423 and the slope across present-day species.

424

425 Multi-response phylogenetic mixed models open a path to interpreting covariance structure  
426 better in two ways, we believe. First, their generating model deals in A-B covariation, which  
427 reflects the nature of reciprocal influences between traits and habitat more satisfactorily than  
428 regression-style models predicting A from B. Second, they quantify the variance and  
429 covariance components more comprehensively. In particular, they quantify conservative trait  
430 correlation CTC, and remain agnostic about whether it is caused by history, by continuing  
431 evolutionary attractors, or by both. Historical and present-day accounts of causation are, in  
432 fact, complementary. Over evolutionary time, new ecological opportunities will very often  
433 have been taken up by speciation from clades that already possess a configuration of traits  
434 close to what will be most successful.

### 435 Acknowledgments

436 Ian Wright kindly put the authors in touch with each other. Warm thanks also to Daniel  
437 Falster and David Warton for much discussion of this topic over the years. Halliwell and  
438 Yates were partly funded by The Australian Research Council Centre of Excellence for Plant  
439 Success in Nature and Agriculture (CE200100015).

440

### 441 Literature cited

442 Ackerly, D. D. 1999. "Comparative Plant Ecology and the Role of Phylogenetic  
443 Information." In *Physiological Plant Ecology*, edited by M.C. Press, J.D Scholes, and  
444 M.G. Barker, 391–413. Blackwell Science.

445 Ackerly, D. D., and P.B. Reich. 1999. "Convergence and Correlations among Leaf Size and  
446 Function in Seed Plants: A Comparative Test Using Independent Contrasts."  
447 *American Journal of Botany* 86 (9): 1272–81.

448 Arif, S., and M. A. MacNeil. 2022. "Applying the Structural Causal Model Framework for  
449 Observational Causal Inference in Ecology." *Ecological Monographs* n/a (n/a):  
450 e1554. <https://doi.org/10.1002/ecm.1554>.

451 Bello, Francesco de, Matty P. Berg, André T. C. Dias, Jose Alexandre F. Diniz-Filho, Lars  
452 Götzenberger, Joaquín Hortal, Richard J. Ladle, and Jan Lepš. 2015. "On the Need for  
453 Phylogenetic 'Corrections' in Functional Trait-Based Approaches." *Folia*  
454 *Geobotanica* 50 (4): 349–57. <https://doi.org/10.1007/s12224-015-9228-6>.

455 Blomberg, S. P., J. G. Lefevre, J. A. Wells, and M. Waterhouse. 2012. "Independent  
456 Contrasts and PGLS Regression Estimators Are Equivalent." *Systematic Biology* 61  
457 (January): 382–91. <https://doi.org/10.1093/sysbio/syr118>.



- 458 Brodribb, T. J., N. M. Holbrook, M. A. Zwieniecki, and B. Palma. 2005. “Leaf Hydraulic  
459 Capacity in Ferns, Conifers and Angiosperms: Impacts on Photosynthetic Maxima.”  
460 *New Phytologist* 165 (3): 839–46.
- 461 Brooks, D.R., and D.A. McLennan. 1991. *Phylogeny, Ecology, and Behavior*. Chicago: U  
462 Chicago Press. <https://press.uchicago.edu/ucp/books/book/chicago/P/bo3626827.html>.
- 463 Carvalho, P., J. A. F. Diniz-Filho, and L. M. Bini. 2006. “Factors Influencing Changes in  
464 Trait Correlations across Species after Using Phylogenetic Independent Contrasts.”  
465 *Evolutionary Ecology* 20 (6): 591–602. <https://doi.org/10.1007/s10682-006-9119-7>.
- 466 Cronin, J. P., and D. R. Schoolmaster Jr. 2018. “A Causal Partition of Trait Correlations:  
467 Using Graphical Models to Derive Statistical Models from Theoretical Language.”  
468 *Ecosphere* 9 (9): e02422. <https://doi.org/10.1002/ecs2.2422>.
- 469 Díaz, S., J. Kattge, J. H. C. Cornelissen, I. J. Wright, Sandra Lavorel, S. Dray, B. Reu, et al.  
470 2016. “The Global Spectrum of Plant Form and Function.” *Nature* 529 (7585): 167–  
471 71. <https://doi.org/10.1038/nature16489>.
- 472 Falster, D. S., A. T. Moles, and M. Westoby. 2008. “A General Model for the Scaling of  
473 Offspring Size and Adult Size.” *American Naturalist* 172 (3): 299–317.  
474 <https://doi.org/10.1086/589889>.
- 475 Felsenstein, J. 1985. “Phylogenies and the Comparative Method.” *American Naturalist* 125:  
476 1–15.
- 477 Garamszegi, L.Z., ed. 2014. *Modern Phylogenetic Comparative Methods and Their  
478 Application in Evolutionary Biology: Concepts and Practice*. Berlin: Springer-Verlag.
- 479 Gould, S. J., and E. S. Vrba. 1982. “Exaptation—a Missing Term in the Science of Form.”  
480 *Paleobiology* 8 (1): 4–15. <https://doi.org/10.1017/S0094837300004310>.
- 481 Grafen, A. 1989. “The Phylogenetic Regression.” *Phil. Trans. Roy. Soc. Lond. B* 326: 119–  
482 57.
- 483 Halliwell, B, L. Yates, and B. Holland. 2022. “Multi-Response Phylogenetic Mixed Models:  
484 Concepts and Application.” *BioRxiv*.  
485 <https://biorxiv.org/cgi/content/short/2022.12.13.520338v1>.
- 486 Hansen, T.F. 2014. “Use and Misuse of Comparative Methods in the Study of Adaptation.”  
487 In *Modern Phylogenetic Comparative Methods and Their Application in Evolutionary  
488 Biology*, 351–79. Berlin: Springer-Verlag. DOI: 10.1007/978-3-662-43550-2\_14.
- 489 Harvey, P.H., and M.D. Pagel. 1991. *The Comparative Method in Evolutionary Biology*.  
490 Edited by R.M. May and P.H. Harvey. Oxford Series in Ecology and Evolution.  
491 Oxford: Oxford University Press.
- 492 Hernán, M. A., J. Hsu, and B. Healy. 2019. “A Second Chance to Get Causal Inference  
493 Right: A Classification of Data Science Tasks.” *CHANCE* 32 (1): 42–49.  
494 <https://doi.org/10.1080/09332480.2019.1579578>.
- 495 Housworth, E. A., E. P. Martins, and M. Lynch. 2004. “The Phylogenetic Mixed Model.” *The  
496 American Naturalist* 163 (1): 84–96. <https://doi.org/10.1086/380570>.
- 497 Huey, R. B., T. Garland, and M. Turelli. 2019. “Revisiting a Key Innovation in Evolutionary  
498 Biology: Felsenstein’s ‘Phylogenies and the Comparative Method.’” *The American  
499 Naturalist* 193 (6): 755–72. <https://doi.org/10.1086/703055>.
- 500 Losos, J. B. 2011. “Seeing the Forest for the Trees: The Limitations of Phylogenies in  
501 Comparative Biology.” *The American Naturalist* 177 (6): 709–27.  
502 <https://doi.org/10.1086/660020>.
- 503 Lynch, M. 1991. “Methods for the Analysis of Comparative Data in Evolutionary Biology.”  
504 *Evolution* 45 (5): 1065–80. <https://doi.org/10.2307/2409716>.
- 505 Marques, I., T. Kneib, and N. Klein. 2022. “Mitigating Spatial Confounding by Explicitly  
506 Correlating Gaussian Random Fields.” *Environmetrics* 33 (5): e2727.  
507 <https://doi.org/10.1002/env.2727>.



- 508 Martins, E. P., and T. F. Hansen. 1997. "Phylogenies and the Comparative Method: A  
509 General Approach to Incorporating Phylogenetic Information into the Analysis of  
510 Interspecific Data." *The American Naturalist* 149 (4): 646–67.  
511 <https://doi.org/10.1086/286013>.
- 512 Pagel, M. 1999. "Inferring the Historical Patterns of Biological Evolution." *Nature* 401  
513 (6756): 877–84. <https://doi.org/10.1038/44766>.
- 514 Paradis, E. 2014. "An Introduction to the Phylogenetic Comparative Method." In L. Z.  
515 Garamszegi (Ed.), *Modern Phylogenetic Comparative Methods and Their Application*  
516 *in Evolutionary Biology*, 3–18. Berlin: Springer-Verlag.
- 517 Pearl, J. 2009. *Causality: Models, Reasoning and Inference*. 2nd ed. Cambridge University  
518 Press.
- 519 Price, T. 1997. "Correlated Evolution and Independent Contrasts." *Phil. Trans. R. Soc. Lond.*  
520 *B* 352: 519–29.
- 521 Revell, L. J. 2010. "Phylogenetic Signal and Linear Regression on Species Data." *Methods in*  
522 *Ecology and Evolution* 1 (4): 319–29. [https://doi.org/10.1111/j.2041-](https://doi.org/10.1111/j.2041-210X.2010.00044.x)  
523 [210X.2010.00044.x](https://doi.org/10.1111/j.2041-210X.2010.00044.x).
- 524 Revell, L. J., and L. J. Harmon. 2022. *Phylogenetic Comparative Methods in R*. Princeton,  
525 N.J.: Princeton U.P.
- 526 Swenson, N. G. 2020. *Phylogenetic Ecology: A History, Critique and Remodeling*. Chicago:  
527 University of Chicago Press.
- 528 Symonds, M.R.E., and S. P. Blomberg. 2014. "A Primer on Phylogenetic Generalised Least  
529 Squares." In *Modern Phylogenetic Comparative Methods and Their Application in*  
530 *Evolutionary Biology*, edited by L Z Garamszegi, 105–30. Springer Berlin  
531 Heidelberg. [https://doi.org/10.1007/978-3-662-43550-2\\_5](https://doi.org/10.1007/978-3-662-43550-2_5).
- 532 Uyeda, J. C, R. Zenil-Ferguson, and M. W. Pennell. 2018. "Rethinking Phylogenetic  
533 Comparative Methods." *Syst Biol* 67 (6): 1091–1109.
- 534 Warton, D. I. 2022. *Eco-Stats: Data Analysis in Ecology*. Cham, Switzerland: Springer  
535 Nature Switzerland AG.
- 536 Warton, D. I., I. J. Wright, D. S. Falster, and M. Westoby. 2006. "Bivariate Line-Fitting  
537 Methods for Allometry." *Biological Reviews* 81 (2): 259–91.
- 538 Yates, L. A., S. A. Richards, and B. W. Brook. 2021. "Parsimonious Model Selection Using  
539 Information Theory: A Modified Selection Rule." *Ecology* 102 (10): e03475.  
540 <https://doi.org/10.1002/ecy.3475>.

541

542

543

## 544 Boxes and Tables

### 545 [Box 1: Phylogenetic correction in brief](#)

546 Consider a dataframe giving traits or habitat properties (columns) across a number of present-  
547 day species or other entities (rows). Also, the species in the data table are connected by a tree  
548 structure representing their phylogeny, as best it is known. Phylogenetic correction of  
549 correlations between columns in such a dataframe has two elements. There is a statistical  
550 procedure, and then an interpretive step whereby the phylogenetically-adjusted relationship  
551 between two traits or between a trait and a habitat is seen as corrected, compared to the raw  
552 correlations across present day species. The implication is that the phylogenetically adjusted  
553 relationship is more reliable, or more enlightening, or that the model is more complete.  
554 Statistical method and interpretation are linked. What generating process is being assumed by  
555 the statistical model, and hence what question exactly does a given statistical method ask?

556

557 One version of the statistical procedure is to transform a set of present-day species into a set  
558 of evolutionary divergences or phylogenetically independent contrasts PICs (Felsenstein  
559 1985). At each node in the tree, an evolutionary divergence or PIC is inferred for each trait.  
560 These divergences, rather than present-day species, then become the objects under study, and  
561 the cases or items of evidence in a statistical procedure. The question is whether divergences  
562 in trait A tend to be correlated in size and direction with divergences in trait B. (For a  
563 polytomy, there is a regression between trait A and trait B across the set of descendant  
564 species or nodes. Indeed for a dichotomy, the divergences can also be thought of as a two-  
565 point regression.) The effect has something in common with a pairing design in social  
566 science, where individuals are matched for (say) gender or age or income, then differences  
567 (“contrasts”) are calculated across the pair for other variables, and the analysis proceeds  
568 using those contrasts as items of evidence, rather than the individuals themselves.

569

570 Currently the method most often used is phylogenetic generalised least squares PGLS  
571 (Grafen 1989; Martins and Hansen 1997). This is a regression model for relationships  
572 between traits across species. The expected residual covariances between each pair of species  
573 are modelled in such a way that higher covariance is expected when the species have  
574 diverged more recently on the phylogenetic tree. If two species are outliers in the same  
575 direction and also have a relatively recent common ancestor, then some covariance between

576 them is seen as expected, and the influence of those residuals on the position of the fitted line  
577 is downweighted accordingly. In other words, the idea that traits are for unspecified reasons  
578 slow to change through evolutionary time (phylogenetic inertia) is part of the causation being  
579 modeled.

580

581 The phylogenetically expected covariances in PGLS scale with the combined branch lengths  
582 shared between species, reflecting a Brownian-motion or diffusion model for trait change.  
583 Often a parameter  $\lambda$  (Pagel 1999) is fitted by maximum likelihood as part of the model. This  
584 is a multiplication factor in the range 0 to 1 for the off-diagonal elements of the  
585 phylogenetically expected residual covariance matrix. If  $\lambda$  is near zero, this effectively makes  
586 the terminal branches of the tree very long, with little covariance expected even between  
587 sister species. (In phylogenetic mixed models PMM discussed in Box 3, an equivalent scaling  
588 is estimated for each response trait (Halliwell et al. 2022)). In addition to the basic Brownian-  
589 motion model, a variety of more complex models have been developed (overview in  
590 Garamszegi 2014), that fit parameters for rates of trait change that vary through time or in  
591 response to other variables.

592

593 PGLS with  $\lambda$  fixed to 1 is mathematically equivalent to PICs, which iteratively calculate  
594 divergences or contrasts at each node through the phylogenetic tree and treat those as a  
595 population of events (Blomberg et al. 2012; Symonds and Blomberg 2014). Under these  
596 circumstances the regression slope and confidence intervals reported by PGLS are  
597 summarizing the population of regression slopes across all the divergences or nodes in the  
598 phylogenetic tree. PGLS with  $\lambda = 0$  yields the ordinary least squares regression slope across  
599 present-day species. With intermediate  $\lambda$ , the slope will lie somewhere in between those two  
600 meanings. Mathematical treatment is provided as Supplementary 2.

601

602

## 603 Box 2. Selected quotes that illustrate uncertainty among experts 604 about what is achieved when controlling for phylogeny

605

606 The majority or standard view is expressed by Garamszegi (2014) in the preface to an edited  
607 book: “*Statistically, the effect of phylogeny can be regarded as a confounding factor that*  
608 *violates assumptions about non-independence of the unit of analysis, and that potentially*  
609 *introduces spurious correlations across traits.*” Similarly Huey et al. (2019): “*Independent*  
610 *contrasts enabled comparative biologists to avoid the statistical dilemma of nonindependence*  
611 *of species values, arising from shared ancestry ... Felsenstein (1985) rapidly and radically*  
612 *changed both evolutionary and organismal biology ... No one would consider ignoring*  
613 *phylogeny when analyzing data involving multiple species ...*”

614

615 As against that majority view, the following quotes make the point that adaptation to niche  
616 and phylogenetic history should not be treated as competing alternatives. Housworth et al  
617 (2004) wrote “*the heritable component contains not only genetic changes but also nongenetic*  
618 *contributions to the phenotype, such as environmental or cultural contributions, that are*  
619 *described by the phylogenetic relationship among the taxa.*” Hansen (2014) wrote “*if related*  
620 *species tend to occur in similar environments (i.e., having similar values of their predictor*  
621 *variables), then we still expect a phylogenetic signal in the response variable. Correcting for*  
622 *phylogeny in this situation is throwing the baby out with the bathwater ... [perhaps] the*  
623 *application of phylogenetic comparative methods has done more harm than good in the study*  
624 *of adaptation.*” De Bello et al (2015) wrote “*Phylogenetic relatedness between species*  
625 *should not be considered a bias to be corrected, but rather an evolutionary signal that allows*  
626 *results to be interpreted at different evolutionary scales.*”

627

628 Any given model reflects a hypothesis about processes generating the observed data (Uyeda,  
629 Zenil-Ferguson, and Pennell 2018): “[*phylogenetic comparative models*] *PCMs are powerful*  
630 *tools for drawing inferences from interspecific data but they necessarily imply some types of*  
631 *causal structures and negate others. It is too much to ask of our methods to decide what*  
632 *questions we ought to ask.*”

633

634 And causation can not be decisively inferred from survey data: “*the validity of causal*  
635 *inferences depends on structural knowledge, which is usually incomplete, to supplement*

636 *the information in the data. As a consequence, no algorithm can quantify the accuracy of*  
637 *causal inferences from observational data” (Hernán, Hsu, and Healy 2019).*  
638

### 639 Box 3: Multi-response phylogenetic mixed models MR-PMM as 640 applied to dissecting covariance between two traits across species

641  
642 In multi-response phylogenetic mixed models, two or more traits appear as responses on the  
643 left hand side of the model equation. Terms on the right hand side include a matrix of  
644 covariances expected from a model of trait change through the phylogeny, as well as trait-  
645 level intercepts and possibly fixed or random variables. With respect to a single-response  
646 model, changing the status of trait B from a predictor for A to a joint response variable with  
647 phylogenetically structured residuals allows phylogenetically conservative A-B correlation  
648 (conservative trait correlation CTC) to be quantitatively identified. The multi-response  
649 approach treats the A-B relationship as a question of trait coordination rather than a question  
650 of predicting A from B. For allometric relationships, this joint view yields a consistent  
651 estimate of trait coordination, via a decomposition of their residual covariation, unlike the  
652 predictive view where the slope estimates depend on whether A is predicted from B or vice  
653 versa (Warton et al. 2006). Indeed, for data generated from a MR-PMM, slope estimates for  
654 B from a misspecified single-response model such as PGLS confound various components of  
655 the generating model (explained further in Supplementary 2).

656  
657 MR-PMMs offer a sufficiently complex and more biologically appropriate model structure  
658 than their single-response analogues. These models simultaneously account for phylogenetic  
659 signal in all included traits and permit a decomposition of the estimated trait correlation  
660 according to dependence on phylogeny. For two species traits A and B, a multi-response  
661 mixed model with phylogenetic covariances modelled as a random effect takes the form

$$663 \begin{pmatrix} A \\ B \end{pmatrix} = \begin{pmatrix} \mu_A + b_A + e_A \\ \mu_B + b_B + e_B \end{pmatrix}$$

664  
665 The  $\mu$ 's are vectors of fixed effects, which can be any linear predictive equation. When the  
666 interest is only in the relationship between traits A and B, i.e. there are no predictors in the  
667 model, these fixed effects would contain only an intercept for each trait.

668  
669 The phylogenetic random effects  $b_A$ ,  $b_B$  and the phylogeny-independent effects  $e_A$ ,  $e_B$  are  
670 drawn from multivariate normal distributions

671

672  $(b_A, b_B) \sim MVN(0, \Sigma^{phy} \otimes C)$

673  $(e_A, e_B) \sim MVN(0, \Sigma^{ind} \otimes I)$

674

675 For two response traits, A and B, and n species in the phylogeny, the covariance matrices for  
676 the random effects and independent errors are of dimensions  $2n \times 2n$ . The covariance of the  
677 phylogenetic random effects  $\Sigma^{phy} \otimes C$  is the Kronecker product of a  $2 \times 2$  trait-level  
678 correlation matrix,  $\Sigma^{phy}$ , with  $C$ , the  $n \times n$  matrix of expected error covariances given a  
679 model of trait evolution applied to a phylogenetic tree. For the simplest case of Brownian  
680 motion,  $C$  is the phylogenetic relatedness matrix. The covariance structure of the residuals or  
681 phylogeny-independent elements  $\Sigma^{ind} \otimes I$ , is the Kronecker product of a  $2 \times 2$  trait-level  
682 correlation matrix  $\Sigma^{ind}$ , with  $I$ , an  $n \times n$  identity matrix (1 for diagonal elements and 0 for  
683 off-diagonal elements). For the two-trait PMM, we estimate two phylogenetic variances for A  
684 and B ( $\Sigma_{AA}^{phy}$  and  $\Sigma_{BB}^{phy}$ ) and the phylogenetic covariance between A and B ( $\Sigma_{AB}^{phy}$ ). The same  
685 is true for independent (co)variances in the elements of  $\Sigma^{ind}$ . When scaled by the relevant  
686 variance components, these covariances yield phylogenetic and residual correlations. Thus,  
687 when appropriately parameterized, the MR-PMM estimates each element listed in Table 1.

688

689 MR-PMM looks at the correlation between A and B rather than at predicting one from the  
690 other. Given a fitted MR-PMM, further derived quantities such as (standardized) major axes  
691 relating A to B (Warton et al. 2006) can be constructed from either point estimates or  
692 posterior distributions of the variance and covariance parameters associated with the two  
693 traits.

694

695 In principle, models with this layout can have any number of species traits or habitat  
696 properties on the left hand side, and also other predictors included in the fixed-effect terms on  
697 the right hand side. More complex models require more replication to yield reliable estimates  
698 (Housworth, Martins, and Lynch 2004). For simplicity, we have confined this explanation to  
699 the correlation between two Gaussian traits, but response variables are not required to be  
700 Gaussian distributed. See Halliwell, Yates and Holland (2022) for details including worked  
701 examples in two popular R packages, ‘MCMCglmm’ and ‘brms’.

702

703



#### 704 Box 4: Past and present-day causation

705 The question whether adaptation should be interpreted as a past versus a present-day process  
706 has long been debated. Palaeobiologists and evolutionists have insisted that adaptation should  
707 refer only to the selective circumstance that initially gave rise to a trait. For example, Gould  
708 and Vrba (1982) coined “exaptation” for functionality that came about subsequent to a trait’s  
709 origin, in order to reserve adaptation for functionality at the time of origin. (For a quantitative  
710 trait such as adult body size, they must have meant “origin” to refer to the time the trait  
711 arrived at a particular value.)

712

713 This defining of terms by evolutionists has mostly stuck over the ensuing 40 years. For  
714 example, Paradis (2014) wrote: “*we can define the phylogenetic comparative method as the*  
715 *analytical study of species, populations, and individuals in a historical framework with the*  
716 *aim to elucidate the mechanisms at the origin of the diversity of life.*” Losos’s (2011)  
717 presidential address to American Society of Naturalists discussed traits and phylogenies.  
718 Summarizing the history of ideas, he wrote “*the key turning point was the publication of*  
719 *Felsenstein’s (1985) article in the American Naturalist, which presented the issue of shared*  
720 *ancestry as a difficulty in comparative analysis and the independent contrasts method as the*  
721 *solution .... publication of books by Brooks and McLennan (1991) and Harvey and Pagel*  
722 *(1991) completed the revolution. Since that time, there has been a continuous, unabated rise*  
723 *in the development and use of phylogenetic comparative methods. Comparative studies now*  
724 *are essentially unpublishable unless analyzed in a phylogenetic context ...*”. Losos 2011 also  
725 wrote in a footnote: “*many reviewers ... have been concerned that this article will give*  
726 *license to ecologists and other ne’er-do-wells to ignore phylogenetic approaches entirely. So,*  
727 *just to be clear, I will say it again: phylogenetics is an important approach for studying*  
728 *historical events .... This article should not be read as license to ignore phylogenetic*  
729 *information in comparative studies!*”

730

731 Phylogenies are indeed essential for studying the history of divergences. But what has  
732 happened here is that comparative studies have been defined as being about history, in the  
733 same way as adaptation earlier was defined as being about history. On the other hand,  
734 ecologists have a continuing interest in the question what traits or trait-combinations make  
735 species successful in what situations in the present day. Losos intended, no doubt, to express  
736 collegiality from evolutionists toward ecologists when he breezily called them ne’er-do-

737 wells. But the collegiality did not extend to permitting ecologists to consider adaptation and  
738 comparative studies as questions about the present day.

739

740 The essential point for ecologists is that patterns such as in Fig 1 where a trait is correlated  
741 both with another trait and with phylogenetic history, called here conservative trait  
742 correlation CTC, can potentially arise from a deep historical divergence followed by limited  
743 subsequent change, or from continuing selection in the present day. The observed pattern  
744 does not give a basis for preferring one explanation to the other, and moreover the two need  
745 not be mutually exclusive. For ecologists aiming to describe trait combinations that confer  
746 present-day competence, it is not sensible to remove the conservative trait correlation from  
747 consideration. That is why we recommend instead the partitioning of variation provided by  
748 MR-PMM (Table 1).

749

750 Table 1. Where variation is attributed by the multi-response phylogenetic mixed  
 751 model (MR-PMM) described here. Key parameters estimated are four standard  
 752 deviations  $\sigma_A^{phy}$ ,  $\sigma_B^{phy}$ ,  $\sigma_A^{ind}$ , and  $\sigma_B^{ind}$ , and two correlations  $\rho_{AB}^{phy}$  and  $\rho_{AB}^{ind}$ .

| Components of variation                                                                                 | expression                                                                                                                                                                         |
|---------------------------------------------------------------------------------------------------------|------------------------------------------------------------------------------------------------------------------------------------------------------------------------------------|
| total variation in A                                                                                    | $\sigma_A^2 = (\sigma_A^{phy})^2 + (\sigma_A^{ind})^2$                                                                                                                             |
| phylogenetic signal in A                                                                                | $\lambda_A = \frac{(\sigma_A^{phy})^2}{\sigma_A^2}$                                                                                                                                |
| total variation in B                                                                                    | $\sigma_B^2 = (\sigma_B^{phy})^2 + (\sigma_B^{ind})^2$                                                                                                                             |
| phylogenetic signal in B                                                                                | $\lambda_B = \frac{(\sigma_B^{phy})^2}{\sigma_B^2}$                                                                                                                                |
| A-B correlation associated with phylogeny (called here conservative trait correlation CTC)              | $\rho_{AB}^{phy} = \frac{\Sigma_{AB}^{phy}}{\sqrt{\Sigma_{AA}^{phy} \Sigma_{BB}^{phy}}}$                                                                                           |
| A-B correlation independent from phylogeny                                                              | $\rho_{AB}^{ind} = \frac{\Sigma_{AB}^{ind}}{\sqrt{\Sigma_{AA}^{ind} \Sigma_{BB}^{ind}}}$                                                                                           |
| total A-B correlation<br>(expression in terms of lambda as given by Housworth, Martins, and Lynch 2004) | $\rho_{AB} = \frac{\Sigma_{AB}^{phy} + \Sigma_{AB}^{ind}}{\sigma_A \sigma_B} = \rho_{AB}^{phy} \sqrt{\lambda_A \lambda_B} + \rho_{AB}^{ind} \sqrt{(1 - \lambda_A)(1 - \lambda_B)}$ |

753

754

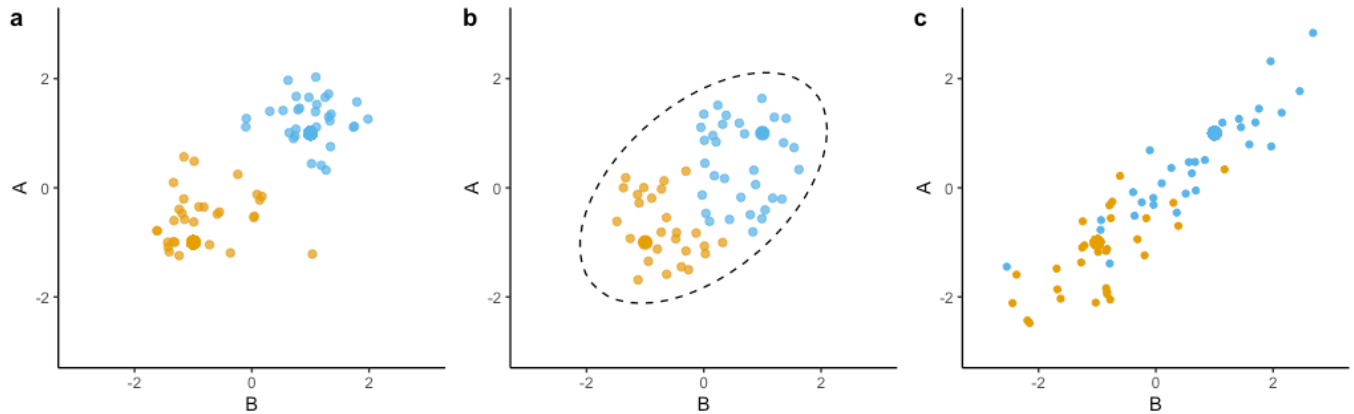

755  
756 Figure 1. Data simulated under different evolutionary models, beginning from two clades  
757 (orange and blue) separated in a space described by two traits A and B. Large solid points  
758 represent the most recent common ancestor for the orange and blue clades in each simulation.  
759 Species then radiate, and traits diversify, within each clade. In simulation (a), radiation of  
760 each major clade proceeds by Brownian motion. The overall correlation between traits has  
761 been produced entirely by the starting points of the two major clades. In simulation (b), the  
762 radiations are positioned at random within a region of trait space (broken line) whereby only  
763 trait combinations within the line are competent to support viable populations. New viable  
764 species are more likely to arise from clades that have existing species nearer to them in trait  
765 space. The observations in present-day species are not distinguishable between simulations  
766 (a) and (b), illustrating how historical vs present-day determination of an overall correlation  
767 can often not be distinguished by analysis of present-day data. A version of this comparison  
768 was first given by Price (1997). In simulation (c), data are produced from a MR-PMM.  
769 Positive correlations between A and B are operating on both the phylogenetic and  
770 independent level ( $\rho_{AB}^{phy} = \rho_{AB}^{ind} = 0.7$ ), resulting in a tight overall relationship between A  
771 and B. Importantly, correlations within each of the major clades and also between them, are  
772 both important drivers of the present-day spectrum of variation.

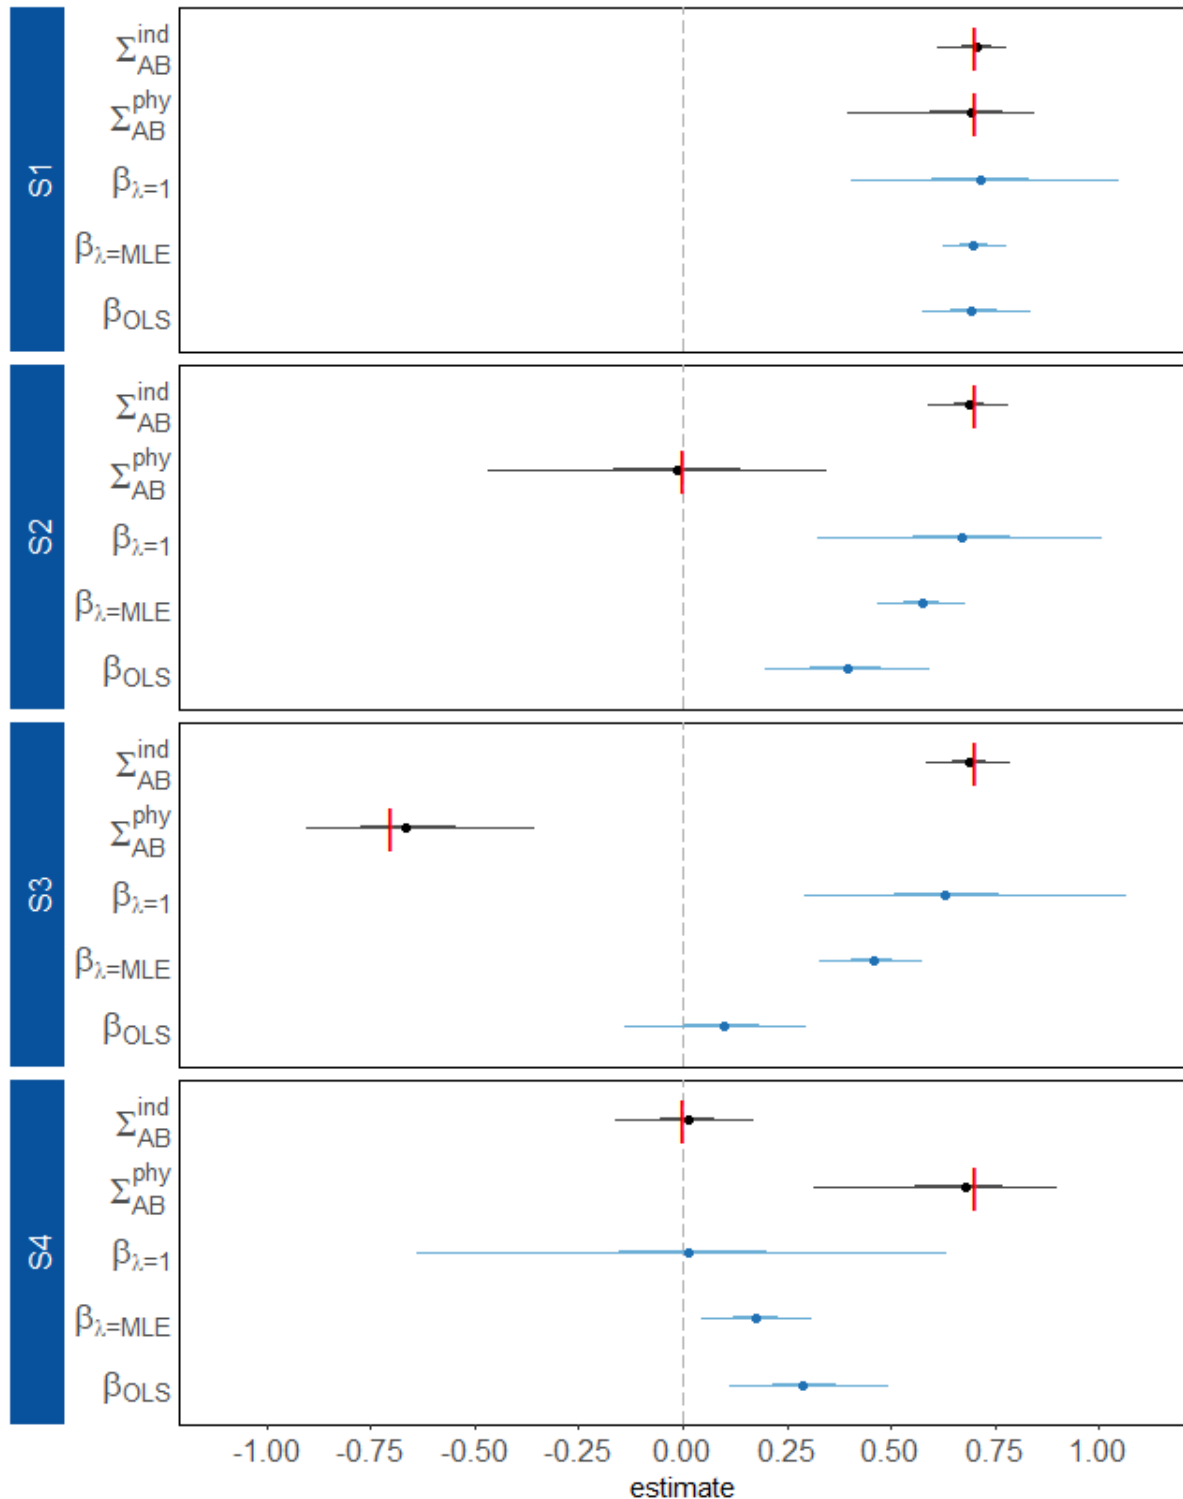

773  
 774 Figure 2. Parameter estimates for phylogenetic and independent covariances (black) from  
 775 MR-PMM, and beta coefficients (blue) from PGLS ( $\beta_{\lambda=1}$ ), PGLS with lambda optimised  
 776 ( $\beta_{\lambda=MLE}$ ), and OLS ( $\beta_{OLS}$ ) fit to simulated datasets (S1-4). Points represent the median  
 777 posterior estimate across 400 model fits, with heavy and light wicks showing the 50% and  
 778 90% sample quantiles, respectively. For each simulation,  $\Sigma_{AA}^{ind} = \Sigma_{BB}^{ind} = \Sigma_{AA}^{phy} = \Sigma_{BB}^{phy} = 1$ .  
 779 True values for  $\Sigma_{AB}^{ind}$  and  $\Sigma_{AB}^{phy}$  used to generate the data for each simulation are indicated by  
 780 vertical red bars.
